# Supplementary material
Source: Research Square preprint supplement (doi:10.21203/rs.3.rs-8990113/v1)
Supplement: Supplementary file 1 [file 488cf1b40eb79858c2738273.docx]

**Figure S1. Serum NGF and BDNF levels in donor rats.** NGF (A) and BDNF (B) concentrations were measured directly in rat sera from the five experimental groups (Control, DPN, Sham, TTT, and TTT+anti-NGF) using ELISA according to the manufacturer’s instructions. n = 6 serum donors per group (one value per rat; technical triplicates averaged). Data are shown as mean ± SD. No significant differences were detected among groups.
