# Supplementary material
Source: Research Square preprint supplement (doi:10.21203/rs.3.rs-8990113/v1)
Supplement: Supplementary file 2 [file 7367629ccfcd81e413afcdd8.docx]

**Figure S2. Full-length uncropped western blot images and membrane cutting/assembly.** The PVDF membrane was cut horizontally at approximately 40–35 kDa to allow separate immunodetection of targets in different molecular-weight regions. The upper membrane segment was probed for β-actin (42 kDa) and the lower segment was probed for NGF (32 kDa); signals were acquired separately. For transparency, the full-length uncropped membrane image containing the molecular-weight marker (left) is provided, and the corresponding β-actin and NGF blot images (right) are shown with the same lane order (Control, DPN, Sham, TTT, TTT+anti-NGF). Images were assembled only to present the cut membrane segments together; no lanes were removed, rearranged, or duplicated.
